# Supplementary material for: Chitosan nanocarriers loaded with salicylic acid for controlling fall armyworm (Spodoptera frugiperda) and alleviating oxidative stress in maize plants
Source: Royal Society of Chemistry journal article supplement (doi:10.1039/d3en00532a), 2023-01-01
Supplement: d3en00532a1.pdf [file d3en00532a1.pdf]

## Supporting information

### **Chitosan nanocarriers loaded with salicylic acid for controlling fall armyworm (*Spodoptera frugiperda*) and alleviating oxidative stress in maize plants**

Jinghong Wang<sup>a</sup>, Mengna Tao<sup>a</sup>, Lanqing Xu<sup>a</sup>, Ningke Fan<sup>a</sup>, Chunjie Zhao<sup>a</sup>, Zhenggao  
Xiao<sup>a,\*</sup>, Zhenyu Wang<sup>a</sup>

<sup>a</sup> Institute of Environmental Processes and Pollution Control, School of  
Environmental and Civil Engineering, Jiangnan University, Wuxi 214122, China

\* Corresponding author:

E-mail address: zhenggao.xiao@jiangnan.edu.cn (Z. Xiao)

## Supplementary method

### Text S1. Measurement of oxidative stress and antioxidant enzyme activity

Superoxide radicals ( $O_2^{\cdot-}$ ) was estimated according to Liu et al. (2021) <sup>1</sup> with slight modification. In brief, 50 mg of maize fresh leaf were ground in liquid nitrogen and added with 0.1 mL 65 mM potassium phosphate buffer (pH = 7.8) and 20  $\mu$ L 10 mM hydroxylamine hydrochloride. After incubating in 25 °C water bath for 20 min, the sample centrifuged at 4 °C, 12,000 rpm for 10 min to obtain supernatant. Subsequently, the supernatant was mixed with 58 mM sulfanilic acid (0.2 mL) and 7 mM naphthyl ethylene diamine dihydrochloride (0.2 mL). After 20 min of reaction, trichloromethane was mixed to the same reaction mixture gently and centrifuged at 2000 rpm for 5 min. The absorbance of the pink aqueous phase was recorded at 530 nm with a multifunctional microplate reader (Varioskan Lux, Thermo Scientific, Finland). A standard curve was prepared with  $NaNO_2$  and used to calculate the production of  $O_2^{\cdot-}$ . The production of  $NO_2^-$  is equivalent to generation of  $O_2^{\cdot-}$ .

Hydrogen peroxide ( $H_2O_2$ ) was estimated based on Sheteiwiy et al. (2021) <sup>2</sup> Briefly, 100 mg of maize fresh leaf were ground into powder with liquid nitrogen and added 1.5 mL of pre-cooled 0.1% trichloroacetic acid (TCA). After centrifuging at 4 °C, 10,000 rpm for 10 min, the supernatant (0.5 mL) mixed with 0.5 mL 10 mM potassium phosphate buffer (pH = 7.0) and 1 mL 1M potassium iodide. The mixture incubated for 1h in dark. The absorbance of reaction mixture was recorded at 390 nm with a multifunctional microplate reader (Varioskan Lux, Thermo Scientific, Finland). Hydrogen peroxide concentration was calculated by using a standard curve prepared

with H<sub>2</sub>O<sub>2</sub>.

Malondialdehyde (MDA) was estimated according to a previous study.<sup>3</sup> Briefly, 100 mg of maize fresh leaf were ground into powder with liquid nitrogen and added 1.5 mL of pre-cooled 0.1% trichloroacetic acid (TCA). After centrifuging at 4 °C, 10,000 rpm for 10min, the supernatant (0.25 mL) reacted with 0.5 mL of 20% TCA and 0.5 mL of 0.5% thiobarbituric acid (TBA) at 95°C for 30 min. Subsequently, the mixture was cooled down on ice before measuring absorbance at 450 nm, 532 nm and 600 nm with a multifunctional microplate reader (Varioskan Lux, Thermo Scientific, Finland). MDA content was determined using the following equation:  
$$C_{\text{MDA}}(\mu\text{mol/L})=6.45*(\text{Absorbance}_{532}-\text{Absorbance}_{600})-0.56*\text{Absorbance}_{450}.$$

The antioxidant enzyme activity of leaves was determined according to the method of Luo et al.<sup>4</sup> and slightly modified. Firstly, for the extraction of enzyme solution, 200 mg of plant samples were homogenized in 1.6 mL of pre-cooled phosphate buffer (pH=7.8), and the supernatant was used as the enzyme solution after vortex at 4 °C and centrifugation at 12000 rpm for 20 min.

For SOD activity, the crude enzyme was mixed with L-methionine, nitroblue tetrazole, riboflavin, and EDTA-Na<sub>2</sub>. The mixture was exposed under a fluorescent tube lamp for 20 min, and then determined by a multifunctional microplate at 560 nm. SOD activity takes the amount of enzyme required to inhibit NBT photoreduction by 50% as one unit of SOD.

For POD activity, the crude enzyme was mixed with 200 mM phosphate buffer solution (pH 6.0) containing guaiacol solution and 30% H<sub>2</sub>O<sub>2</sub>, the mixtures were

immediately measured in the wavelength of 470 nm for 2min each 30s by a multifunctional microplate reader. The increase in OD value of 0.01 per minute was considered as one unit of POD.

For CAT activity, the absorbance of 200  $\mu$ L of the reaction mixture (15 mM phosphate buffer (pH 7.0), 0.05% H<sub>2</sub>O<sub>2</sub>, and 6.67  $\mu$ L enzyme extracts) was recorded for 3 min at 240 nm. The reduction of 0.01 of OD value per min was used as one unit of CAT.

### **Text S2. Determination of leaf phytohormones by UHPLC-MS/MS**

The content of phytohormones (JA and SA) in maize leaves were determined according to a previous method <sup>5</sup> with a slight modification. A 5  $\mu$ L aliquot of extract solution was then directly injected into a UHPLC-MS/MS system (Vanquish Flex, Thermofisher Scientific, Germany) with a 2.1  $\times$  100 mm  $\times$  1.8  $\mu$ m C18 column (Acquity HSS T3, Waters, USA) coupled to Q-Exactive Plus mass spectrometer (Thermo Fisher Scientific, USA). The mobile phase A (H<sub>2</sub>O, 0.01% formic acid) and B (acetonitrile, 0.01% formic acid formic acid in acetonitrile) were used for the elution gradient: 0 min, 5 % B; 1.5 min, 5 % B; 9 min, 70 % B; 10 min, 70 % B; 10.1 min, 5 % B; 15 min, 5 % B. The flow rate was 0.35 mL min<sup>-1</sup>. The concentration of phytohormones was conducted by using a calibration equation obtained by linear regression from five calibration points for each analysis. The R<sup>2</sup> value for the JA and SA standard was 0.9992, 0.9984, respectively.

### **Text S3. The parameters of UHPLC-MS/MS for determining BXs**

The analysis of benzoxazinoids was performed on an HPLC system (Vanquish Flex, Thermofisher Scientific) with a C<sub>18</sub> column (2.1 × 100 mm, 1.8 μm, Acquity HSS T3, Waters) coupled to a Q-Exactive Plus mass spectrometer (Thermo Fisher Scientific) with an electrospray ionization (ESI) source. Gradient elution was performed at 5–20% B over 3.0 min, 20–98% B over 3.0 min, holding at 98% B for 1 min, followed by re-equilibration at 5% A for 3.0 min, where A = 0.05% formic acid/water (v/v) and B = 0.05% formic acid/acetonitrile (v/v). The flow rate was 0.3 mL/min. The temperature of the column was maintained at 40 °C, and the injection volume was 5 μl. The ESI mass spectrometer was operated in a positive Q3 scan mode.<sup>6</sup> The abundance of each metabolite was quantified from its peak area normalized by the area of internal stand. The data obtained was used for subsequent analysis

**Table S1.** Primer sequences used in this study.

| Gene                  | Primer  | Sequence                                          | Reference             |
|-----------------------|---------|---------------------------------------------------|-----------------------|
| <i>Pep1</i>           | Forward | CAGCCACCGAGGTGTGGG                                | Gene ID:<br>103645871 |
|                       | Reverse | CAGCCACCGAGGTGTGGG                                |                       |
| <i>Pep3</i>           | Forward | CCTCCCTGCCGAAACTAAA                               | Gene ID:<br>103645874 |
|                       | Reverse | CCTCCCTGCCGAAACTAAA                               |                       |
| <i>JAR1a</i>          | Forward | GGCCGGGCCCATGACAATCTGCAGTAGTGAAG                  | 7                     |
|                       | Reverse | CGCGTTTAAACAGAGCCCATACGCAGTGCTGA                  |                       |
| <i>JAR1b</i>          | Forward | CGCGGGCCCATGCCGATCTGTAGCTGTGAAG                   | 7                     |
|                       | Reverse | CGCGTTTAAACAGAGCCCATAGGCGGTAAGTAA                 |                       |
| <i>JAC1</i>           | Forward | CGCGTTTAAACATGGAGAACCCTGCTCCGAGC                  | 7                     |
|                       | Reverse | CGCCCTGCAGGCCCGAGGCCTGCCTGGCACCAC                 |                       |
| <i>AMP</i>            | Forward | AAAAGGGCCCATGGAGAGTGGCAGCAAGAAG                   | 7                     |
|                       | Reverse | CGCGTTTAAACATTTACGCAGAGTTTGTTTTCA                 |                       |
| <i>MPI</i>            | Forward | CGCGGGCCCATGAGCTCCACGGAGTGCGGC                    | 7                     |
|                       | Reverse | CGCGTTTAAACAGCCGATGTGGGGCGTCTGGGC                 |                       |
| <i>RIP2</i>           | Forward | GTTTTGGATATTGAGCACTACGCAGCGGAGCCAAACCCAGAGTTGAGTG | 7                     |
|                       | Reverse | GGATTGGTGAAACACGTCCTCGTTTTGGTCCTTAACGAGCGCAAC     |                       |
| <i>B73 lox</i>        | Forward | GCGACACCATGACCATCAAC                              | 8                     |
|                       | Reverse | GCGACACCATGACCATCAAC                              |                       |
| <i>Cystin-like PI</i> | Forward | CAAGGAGCACAACAGGCAGA                              | 8                     |
|                       | Reverse | GGACATGAGCTGGCGATTTT                              |                       |

---

|              |         |                      |   |
|--------------|---------|----------------------|---|
| <i>Actin</i> | Forward | CCATGAGGCCACGTACAACT | 9 |
|              | Reverse | GGTAAAACCCCACTGAGGA  |   |

---

**Table S2.** Time-dependent changes of the cumulative release of SA under various pH conditions. Data were expressed as means  $\pm$  standard error (SE, n = 6). Different letters in the same row indicate significant differences among pH gradients (Tukey's HSD,  $p < 0.05$ ).

| Time/h | pH = 3              | pH = 4               | pH = 5               | pH = 6              | pH = 7              | pH = 8              |
|--------|---------------------|----------------------|----------------------|---------------------|---------------------|---------------------|
| 1      | 27.35 $\pm$ 1.50 a  | 30.81 $\pm$ 4.21 a   | 29.08 $\pm$ 10.28 ab | 37.43 $\pm$ 7.78 ab | 26.03 $\pm$ 2.42 b  | 22.10 $\pm$ 6.28 b  |
| 2      | 32.93 $\pm$ 7.23 a  | 30.88 $\pm$ 1.86 a   | 29.15 $\pm$ 3.68 a   | 31.88 $\pm$ 5.73 a  | 33.01 $\pm$ 3.84 a  | 26.43 $\pm$ 2.01 a  |
| 4      | 65.02 $\pm$ 5.08 a  | 60.08 $\pm$ 5.75 b   | 52.36 $\pm$ 1.85 b   | 51.39 $\pm$ 1.86 b  | 48.43 $\pm$ 2.54 b  | 44.23 $\pm$ 3.53 b  |
| 8      | 70.53 $\pm$ 10.54 a | 58.86 $\pm$ 2.64 ab  | 55.29 $\pm$ 4.46 ab  | 57.84 $\pm$ 6.34 b  | 57.61 $\pm$ 3.53 ab | 51.30 $\pm$ 4.82 ab |
| 12     | 92.90 $\pm$ 7.09 a  | 88.14 $\pm$ 10.78 ab | 79.19 $\pm$ 7.02 ab  | 79.54 $\pm$ 2.68 b  | 74.56 $\pm$ 6.01 b  | 69.74 $\pm$ 5.17 b  |
| 24     | 96.83 $\pm$ 14.04 a | 86.35 $\pm$ 9.78 a   | 79.11 $\pm$ 5.63 a   | 84.06 $\pm$ 1.43 a  | 80.87 $\pm$ 2.66 a  | 79.32 $\pm$ 5.04 a  |
| 36     | 96.99 $\pm$ 9.67 a  | 86.51 $\pm$ 8.11 ab  | 79.27 $\pm$ 1.47 ab  | 84.22 $\pm$ 3.19 b  | 81.04 $\pm$ 7.14 ab | 79.49 $\pm$ 4.42 ab |
| 48     | 96.83 $\pm$ 14.04 a | 86.35 $\pm$ 9.78 a   | 80.04 $\pm$ 7.24 a   | 85.59 $\pm$ 2.42 a  | 79.80 $\pm$ 10.45 a | 82.99 $\pm$ 3.82 a  |
| 60     | 97.36 $\pm$ 10.86 a | 86.88 $\pm$ 7.80 ab  | 80.57 $\pm$ 4.07 ab  | 86.79 $\pm$ 1.58 b  | 83.60 $\pm$ 6.26 ab | 79.89 $\pm$ 5.71 ab |
| 72     | 98.83 $\pm$ 5.21 a  | 88.35 $\pm$ 7.01 a   | 81.74 $\pm$ 2.13 a   | 87.29 $\pm$ 6.95 a  | 85.07 $\pm$ 11.74 a | 81.35 $\pm$ 8.91 a  |



**Figure S1**

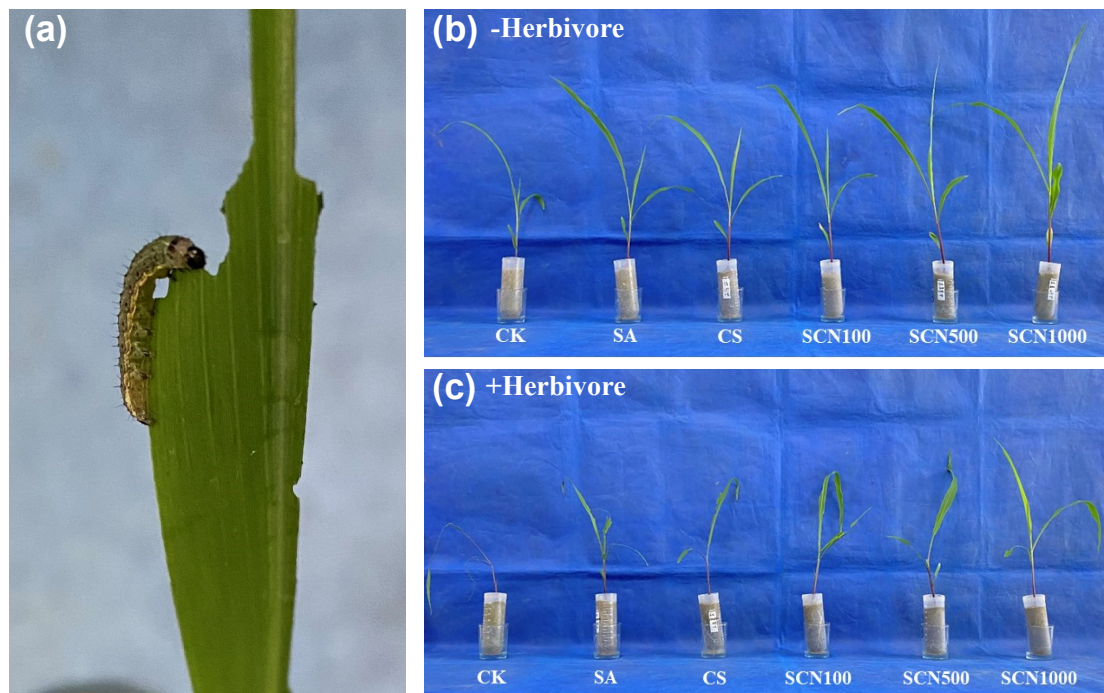

**Fig. S1.** (a) Photograph of maize leaves damaged by fall armyworm (*Spodoptera frugiperda*); Pot experiment results for testing the effect of SCNs on the growth of maize without (-Herbivore, b) and with (+Herbivore, c) the presence of *S. frugiperda*.

Figure S2

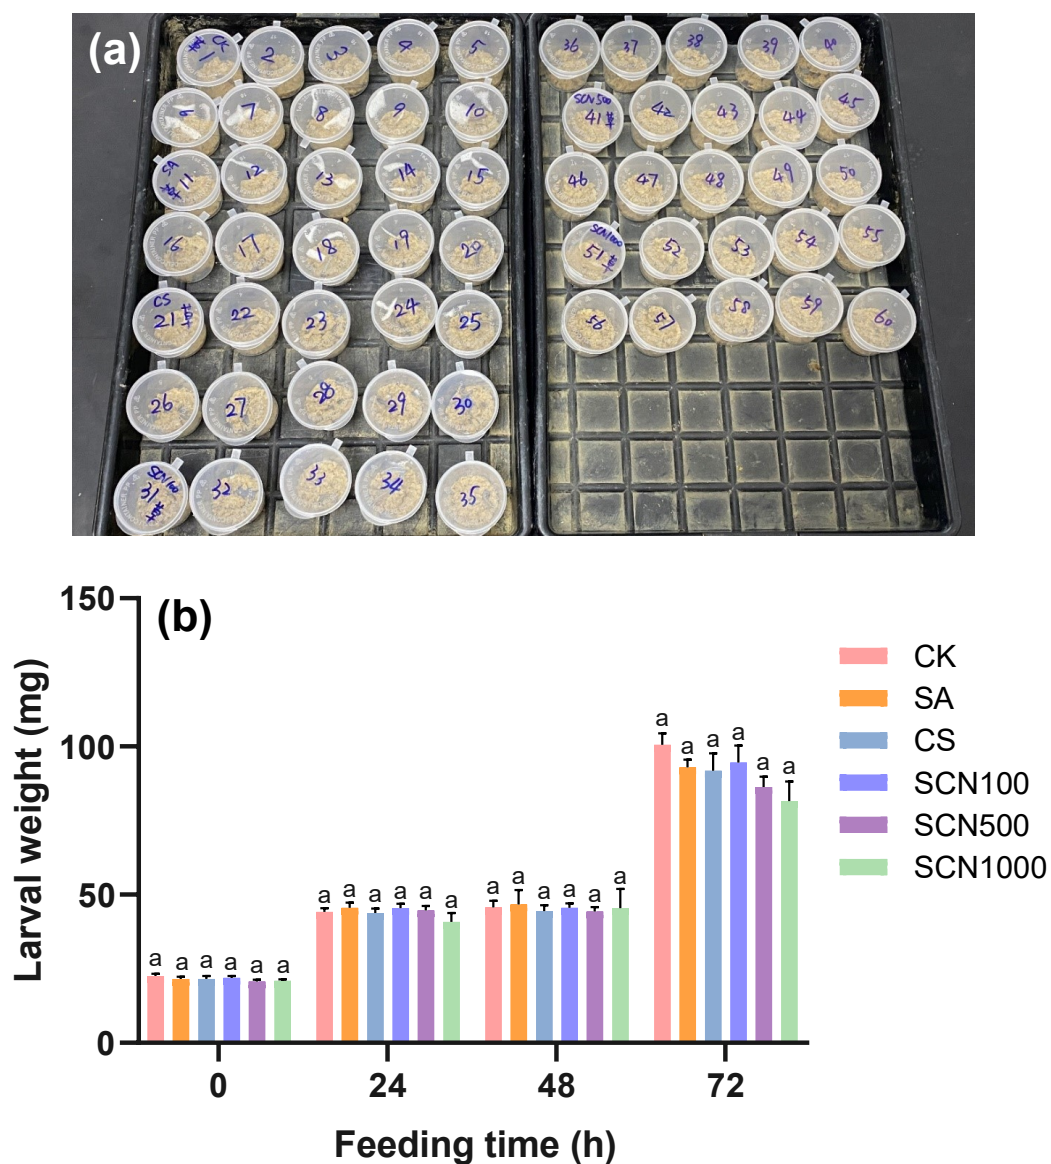

**Fig. S2.** *In vitro* feeding experiment with artificial diet testing the direct insecticidal effect of SA, CS, SCN100, SCN500 and SCN1000 in the boxes within 72 h feeding period (a). Larval weight (b). Data are means  $\pm$  SE ( $n = 10$ ). Different letters indicate significant difference among treatments at each feeding time ( $p < 0.05$ ).

**Figure S3**

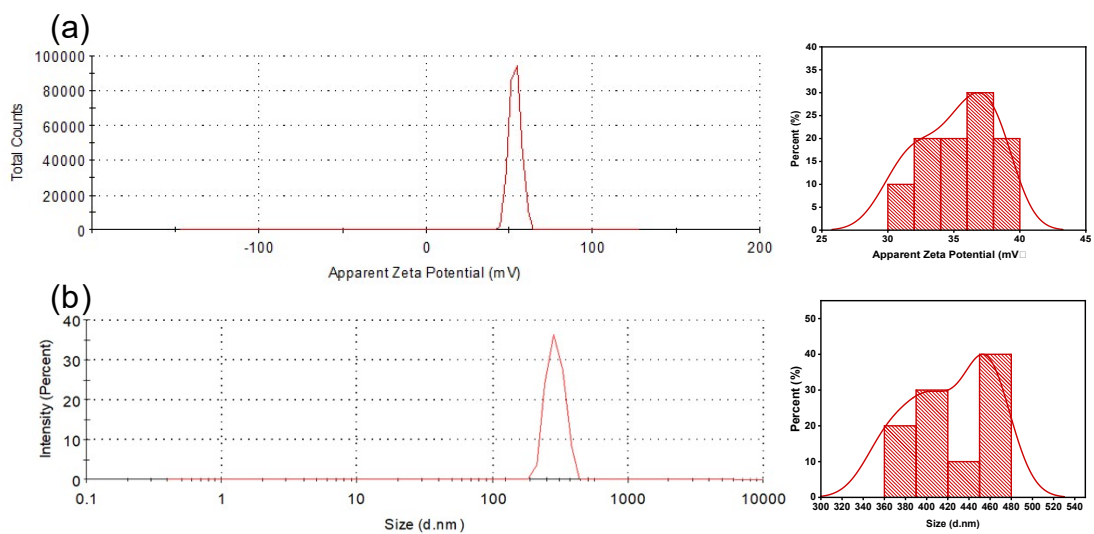

**Fig. S3.** DLS analysis for the (a) size distribution, and (b) zeta-potential of SCN.

**Figure S4**

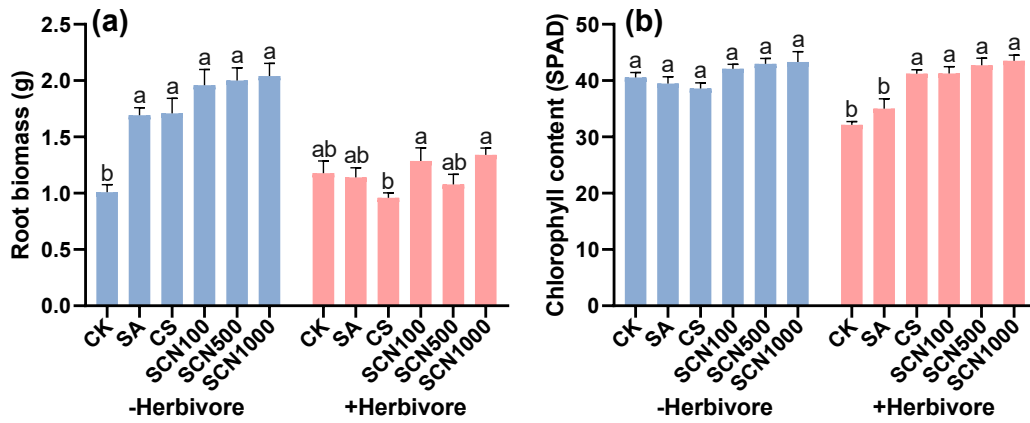

**Fig. S4.** Effect of SCNs on maize growth functional traits in the absence (–Herbivore) and presence (+Herbivore) of fall armyworm: Root biomass (a) and leaf chlorophyll (b). Significant differences among treatments are identified by different lowercase letters in the absence and presence of fall armyworm, respectively ( $p < 0.05$ ).

Figure S5

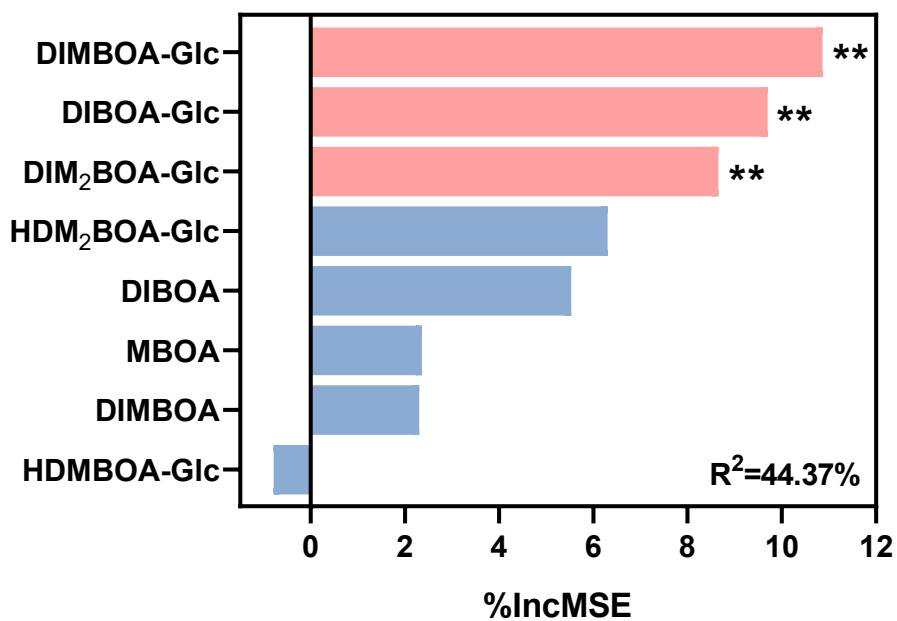

**Fig. S5.** Relative contribution of main benzoxazinoids to larval growth in terms of the weight gain. Shown is the mean predictor importance (%IncMSE) from the random forest analyses. Significance level of predictor is  $**p < 0.01$ .

**Figure S6**

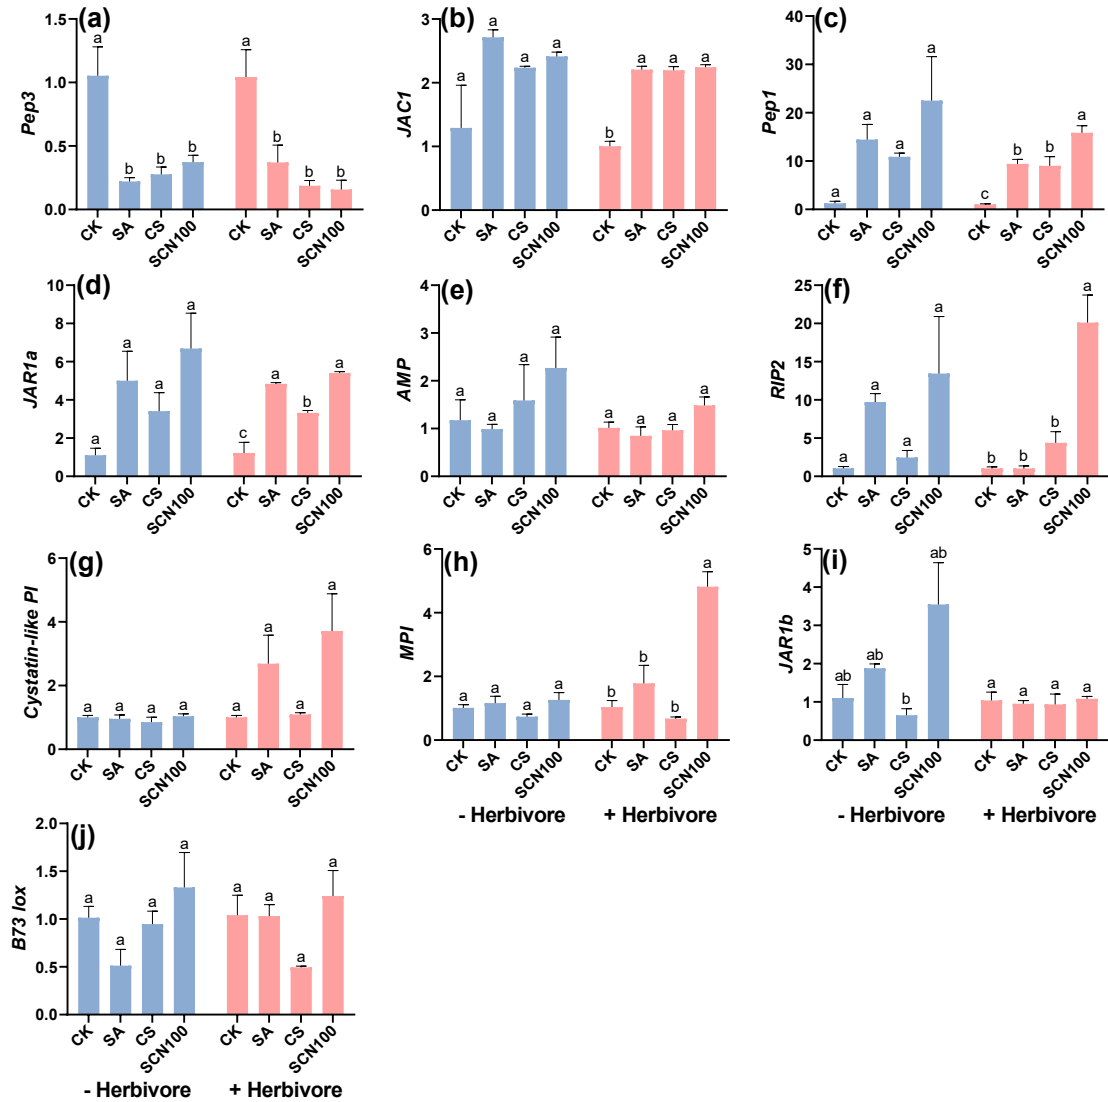

**Fig. S6.** Effect of SCN on maize leaf anti-insect gene expression in the absence (–Herbivore) and presence (+Herbivore) of fall armyworm: *Pep3* (a), *JAC1* (b), *Pep1* (c), *JAR1a* (d), *AMP* (e), *RIP2* (f), *Cystatin-like PI* (g), *MPI* (h), *JAR1b* (i), *B73 lox* (j). Significant differences among treatments are identified by different lowercase letters in the absence and presence of fall armyworm, respectively ( $p < 0.05$ ).

## REFERENCES

1. J. Liu, L. Gai and H. Zong, Foliage application of chitosan alleviates the adverse effects of cadmium stress in wheat seedlings (*Triticum aestivum* L.), *Plant Physiol. Biochem.*, 2021, **164**, 115-121.
2. M. S. Sheteiwy, H. Shao, W. Qi, P. Daly, A. Sharma, H. Shaghaleh, Y. A. Hamoud, M. A. El-Esawi, R. Pan, Q. Wan and H. Lu, Seed priming and foliar application with jasmonic acid enhance salinity stress tolerance of soybean (*Glycine max* L.) seedlings, *J. Sci. Food Agric.*, 2021, **101**, 2027-2041.
3. A. R. Sofy, A. A. Hmed, A. E. M. Alnaggar, R. A. Dawoud, R. F. M. Elshaarawy and M. R. Sofy, Mitigating effects of Bean yellow mosaic virus infection in faba bean using new carboxymethyl chitosan-titania nanobiocomposites, *Int. J. Biol. Macromol.*, 2020, **163**, 1261-1275.
4. X. Luo, X. Cao, C. Wang, L. Yue, X. Chen, H. Yang, X. Le, X. Zhao, F. Wu, Z. Wang and B. Xing, Nitrogen-doped carbon dots alleviate the damage from tomato bacterial wilt syndrome: systemic acquired resistance activation and reactive oxygen species scavenging, *Environ. Sci. Nano*, 2021, **8**, 3806-3819.
5. Z. Xiao, N. Fan, W. Zhu, H. L. Qian, X. P. Yan, Z. Wang and S. Rasmann, Silicon nanodots increase plant resistance against herbivores by simultaneously activating physical and chemical defenses, *ACS Nano*, 2023, **17**, 3107-3118.
6. L. Gao, G. Shen, L. Zhang, J. Qi, C. Zhang, C. Ma, J. Li, L. Wang, S. U. Malook and J. Wu, An efficient system composed of maize protoplast transfection and HPLC-MS for studying the biosynthesis and regulation of maize benzoxazinoids,

*Plant Methods*, 2019, **15**, 144.

7. S. H. Chung, M. Bigham, R. R. Lappe, B. Chan, U. Nagalakshmi, S. A. Whitham, S. P. Dinesh-Kumar and G. Jander, Rapid screening of pest resistance genes in maize using a sugarcane mosaic virus vector, *BioRxiv*, 2021, **13**, 425472.
8. J. Ton, M. D'Alessandro, V. Jourdie, G. Jakab, D. Karlen, M. Held, B. Mauch-Mani and T. C. Turlings, Priming by airborne signals boosts direct and indirect resistance in maize, *Plant J.*, 2007, **49**, 16-26.
9. Wang, W. Zhu, F. Chen, L. Yue, Y. Ding, H. Xu, S. Rasmann and Z. Xiao, Nanosilicon enhances maize resistance against oriental armyworm (*Mythimna separata*) by activating the biosynthesis of chemical defenses, *Sci. Total Environ.*, 2021, **778**, 146378.
